# Supplementary material for: Measuring Timeliness of Outbreak Response in the World Health Organization African Region, 2017–2019
Source: PubMed Central journal article supplement (PMC7588517; doi:10.3201/eid2611.191766), 2020-11
Supplement: 19-1766-Techapp-s1.pdf [file 19-1766-Techapp-s1.pdf]

# Measuring Timeliness of Outbreak Response in the World Health Organization African Region, 2017–2019

## Appendix

**Appendix Table.** Representativeness of samples from the population of outbreaks reported, WHO African Region, 2017–2019

| Variable                                | Modalities              | Total (N = 296) |       | Time to detection |      | Time to notification |      | Time to control |      |
|-----------------------------------------|-------------------------|-----------------|-------|-------------------|------|----------------------|------|-----------------|------|
|                                         |                         | N*              | %     | n†                | %    | n†                   | %    | n†              | %    |
| Income (16)                             | Low                     | 156             | 52.7  | 107               | 58.2 | 127                  | 54.7 | 109             | 54.2 |
|                                         | Middle and high         | 140             | 47.3  | 77                | 41.8 | 105                  | 45.3 | 92              | 45.8 |
| WHO subregion (10)                      | Eastern/Southern        | 133             | 44.9  | 78                | 42.4 | 96                   | 41.4 | 96              | 47.8 |
|                                         | Western                 | 102             | 34.5  | 74                | 40.2 | 88                   | 37.9 | 37              | 18.4 |
|                                         | Central                 | 61              | 20.6  | 32                | 17.4 | 48                   | 20.7 | 68              | 33.8 |
| Outbreak start date (15)                | 2017                    | 103             | 34.8‡ | 75                | 40.8 | 87                   | 37.5 | 62              | 30.8 |
|                                         | 2018                    | 101             | 33.1‡ | 62                | 33.7 | 83                   | 35.8 | 72              | 35.8 |
|                                         | 2019                    | 87              | 29.4‡ | 47                | 25.5 | 62                   | 26.7 | 67              | 33.4 |
| No. refugees from elsewhere (13)        | low§                    | 199             | 67.2  | 129               | 70.1 | 160                  | 69.0 | 133             | 66.2 |
|                                         | high§                   | 97              | 32.8  | 55                | 29.9 | 72                   | 31.0 | 68              | 33.8 |
| IDP (% population) (13)                 | low§                    | 212             | 71.6  | 139               | 75.5 | 170                  | 73.3 | 145             | 72.1 |
|                                         | high§                   | 84              | 28.4  | 45                | 24.5 | 62                   | 26.7 | 56              | 27.9 |
| Disease category                        | Food-/waterborne        | 74              | 25.0  | 47                | 25.5 | 54                   | 23.3 | 60              | 29.9 |
|                                         | Vector-borne            | 48              | 16.2  | 24                | 13.0 | 34                   | 14.7 | 31              | 15.4 |
|                                         | Viral hemorrhagic fever | 56              | 18.9  | 41                | 22.4 | 49                   | 21.1 | 37              | 18.4 |
|                                         | Vaccine-preventable     | 85              | 28.7  | 49                | 26.6 | 67                   | 28.9 | 52              | 25.9 |
|                                         | Other                   | 33              | 11.2  | 23                | 12.5 | 28                   | 12.0 | 21              | 10.4 |
| Current health expenditure (% GDP) (13) | low§                    | 162             | 54.7  | 99                | 53.8 | 126                  | 54.3 | 112             | 55.7 |
|                                         | high§                   | 134             | 45.3  | 85                | 46.2 | 106                  | 45.7 | 89              | 44.3 |
| Population density (13)                 | low§                    | 201             | 67.9  | 121               | 65.8 | 157                  | 67.7 | 131             | 65.2 |
|                                         | high§                   | 95              | 32.1  | 63                | 34.2 | 75                   | 32.3 | 70              | 34.8 |

GDP, gross domestic product; IDP, internally displaced persons; IQR, interquartile range; Med., median

\*N, based on records of total outbreaks meeting selection criteria (total for each modality = 296)

†n, based on records of total outbreaks minus those with key missing dates (n = 184 [detection], n = 132 [notification], n = 201 [control] for each modality)

‡Because 5 reports in the initial dataset were missing key dates, the percentages do not total 100%. Data from those reports were not included in the findings.

§Low indicates ≤ median, high indicates > median of in-country value for variable compared with that value for all countries in the African region
